# Supplementary material for: Temperature-Related Summer Mortality Under Multiple Climate, Population, and Adaptation Scenarios
Source: PubMed Central journal article supplement (PMC6466250; doi:10.3390/ijerph16061026), 2019-03-21
Supplement: ijerph-16-01026-s001.pdf [file ijerph-16-01026-s001.pdf]

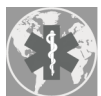

# Temperature-related summer mortality under multiple climate, population and adaptation scenarios

Jae Young Lee, Woo-Seop Lee, Kristie L. Ebi and Ho Kim

**Table S1.** The city-specific minimum, average, and maximum summer temperature during the baseline period (1991–2015).

| City    | Minimum (°C) | Average (°C) | Maximum (°C) |
|---------|--------------|--------------|--------------|
| Seoul   | 10.8         | 24.6         | 38.4         |
| Busan   | 12.4         | 23.7         | 35.8         |
| Daegu   | 9.8          | 25.3         | 39.4         |
| Incheon | 11.9         | 23.6         | 37.2         |
| Gwangju | 8.7          | 24.9         | 38.5         |
| Daejeon | 8.1          | 24.6         | 37.7         |
| Ulsan   | 10.8         | 24.3         | 38.8         |

**Table S2.** GCMs used in this study. This table contains model name, modelling center that developed each model and country information.

| Model Name     | Modelling Center                                                                              | Country  |
|----------------|-----------------------------------------------------------------------------------------------|----------|
| BCC-CSM1.1     | Beijing Climate Center Climate System Model                                                   | China    |
| BCC-CSM1.1-M   |                                                                                               |          |
| CanESM2        | Canadian Centre for Climate Modelling and Analysis                                            | Canada   |
| CCSM4          | National Center for Atmospheric Research                                                      | USA      |
| CESM1-BGC      | Community Earth System Model Contributors                                                     | USA      |
| CESM1-CAM5     |                                                                                               |          |
| CMCC-CM        | Centro Euro-Mediterraneo sui Cambiamenti Climatici                                            | Italy    |
| CNRM-CM5       | Centre National de Recherches Météorologiques                                                 | France   |
| FGOALS-s2      |                                                                                               |          |
| GFDL-ESM2G     | NOAA Geophysical Fluid Dynamics Laboratory                                                    | USA      |
| GFDL-ESM2M     |                                                                                               |          |
| HadGEM2-AO     | National Institute of Meteorological Research                                                 | S. Korea |
| HadGEM2-CC     | Met Office Hadley Centre for Climate Science and Service                                      | UK       |
| HadGEM2-ES     |                                                                                               |          |
| INM-CM4        | Institute for Numerical Mathematics                                                           | Russia   |
| IPSL-CM5A-LR   | Institut Pierre-Simon Laplace                                                                 | France   |
| IPSL-CM5A-MR   |                                                                                               |          |
| IPSL-CM5B-LR   | Japan Agency for Marine-Earth Science and Technology, Atmosphere and Ocean Research Institute | Japan    |
| MIROC-ESM      |                                                                                               |          |
| MIROC-ESM-CHEM |                                                                                               |          |
| MIROC5         | Atmosphere and Ocean Research Institute                                                       | Japan    |
| MPI-ESM-LR     | Max Planck Institute for Meteorology                                                          | Germany  |
| MPI-ESM-MR     |                                                                                               |          |
| MRI-CGCM3      | Meteorological Research Institute                                                             | Japan    |
| NorESM1-M      | Norwegian Climate Centre                                                                      | Norway   |

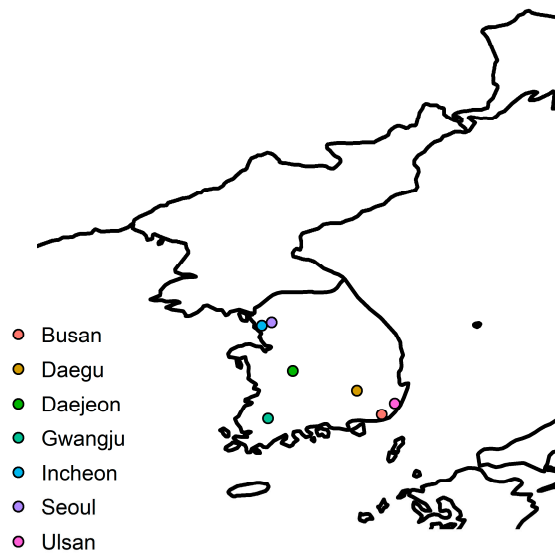

**Figure S1.** Map of South Korea and the locations of the 7 cities.

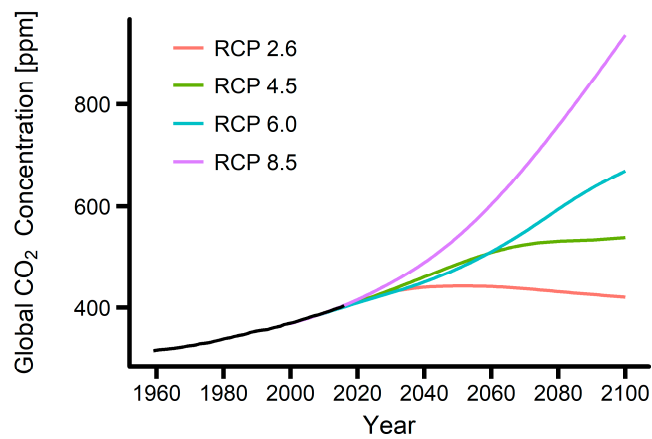

**Figure S2.** Projection of global CO<sub>2</sub> concentrations under four RCP scenarios. Black line indicates the historical global CO<sub>2</sub> concentrations (1960–2018). The data is obtained from <http://data.okfn.org/data/core/co2-ppm> and <http://www.iiasa.ac.at/web-apps/tnt/RcpDb>.

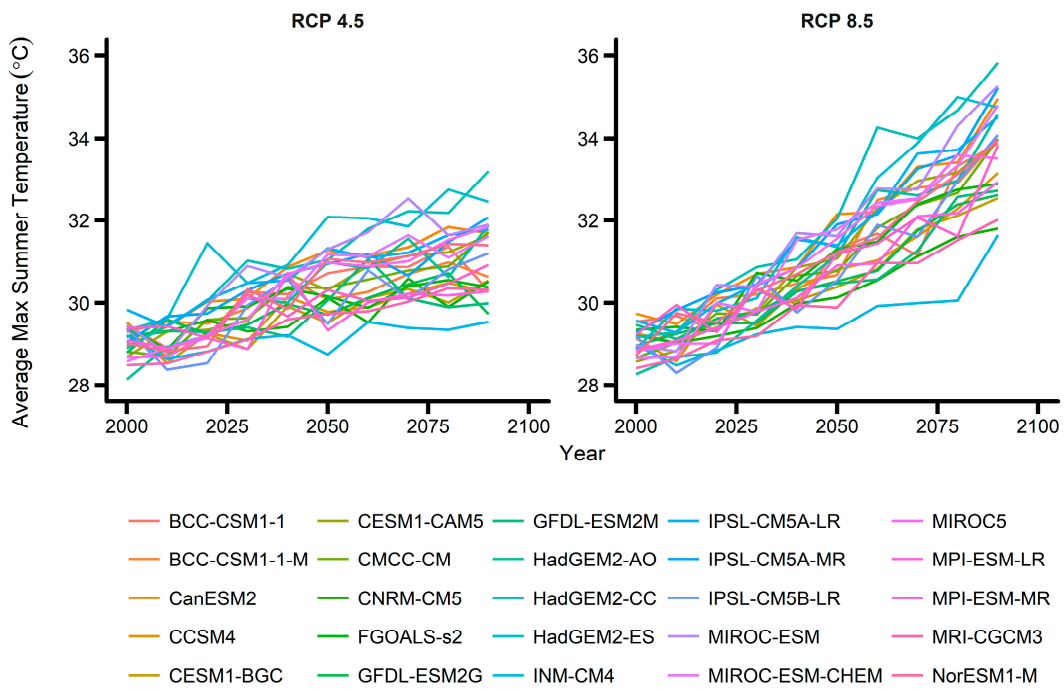

**Figure 3.** The 10-year-average daily maximum summer (Jun–Aug) temperature in South Korea under RCP 4.5 and 8.5 from 2000s to 2090s.

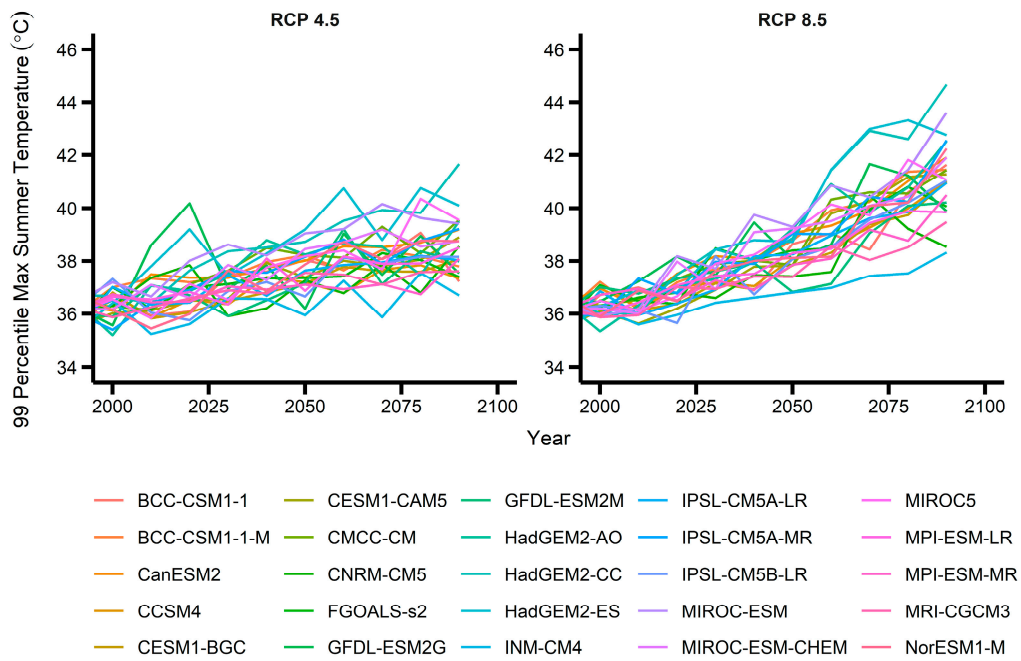

**Figure S4.** The 99-percentile daily maximum summer (Jun–Aug) temperature in South Korea under RCP 4.5 and 8.5 for each 10-year period from 2000s to 2090s.

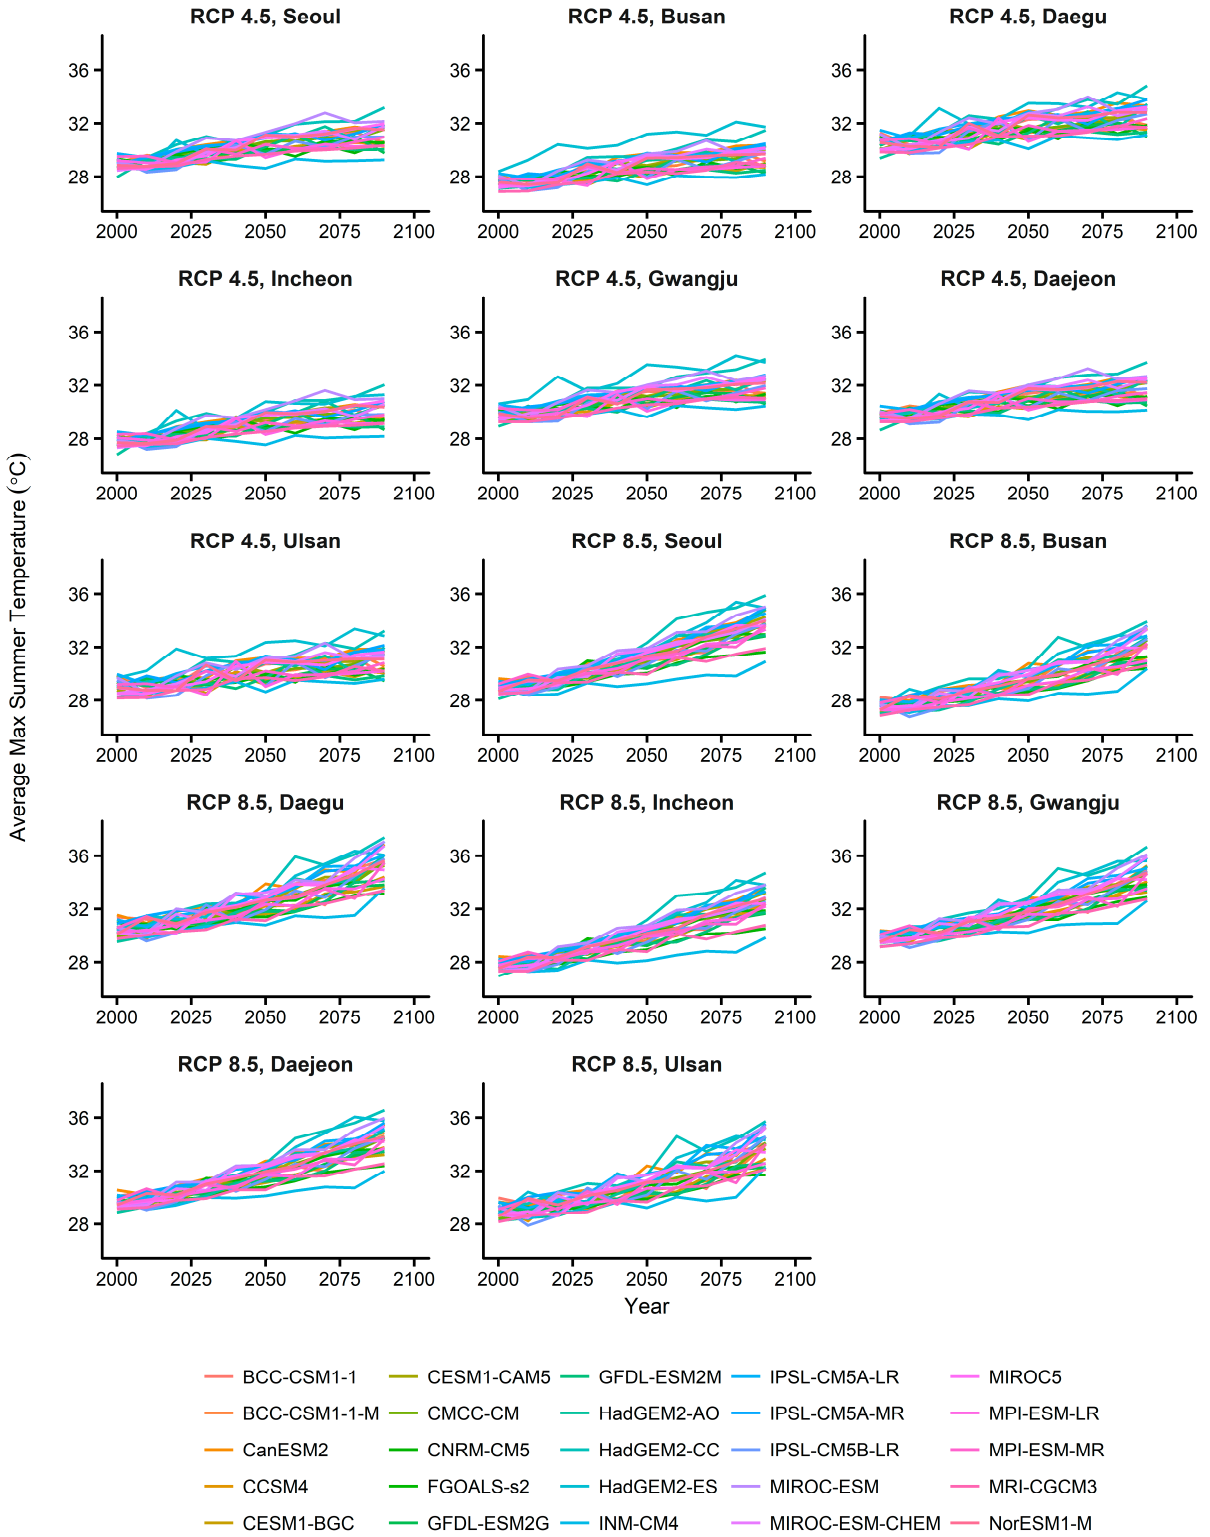

**Figure S5.** The city-specific future summer temperature changes from 2000s to 2090s.

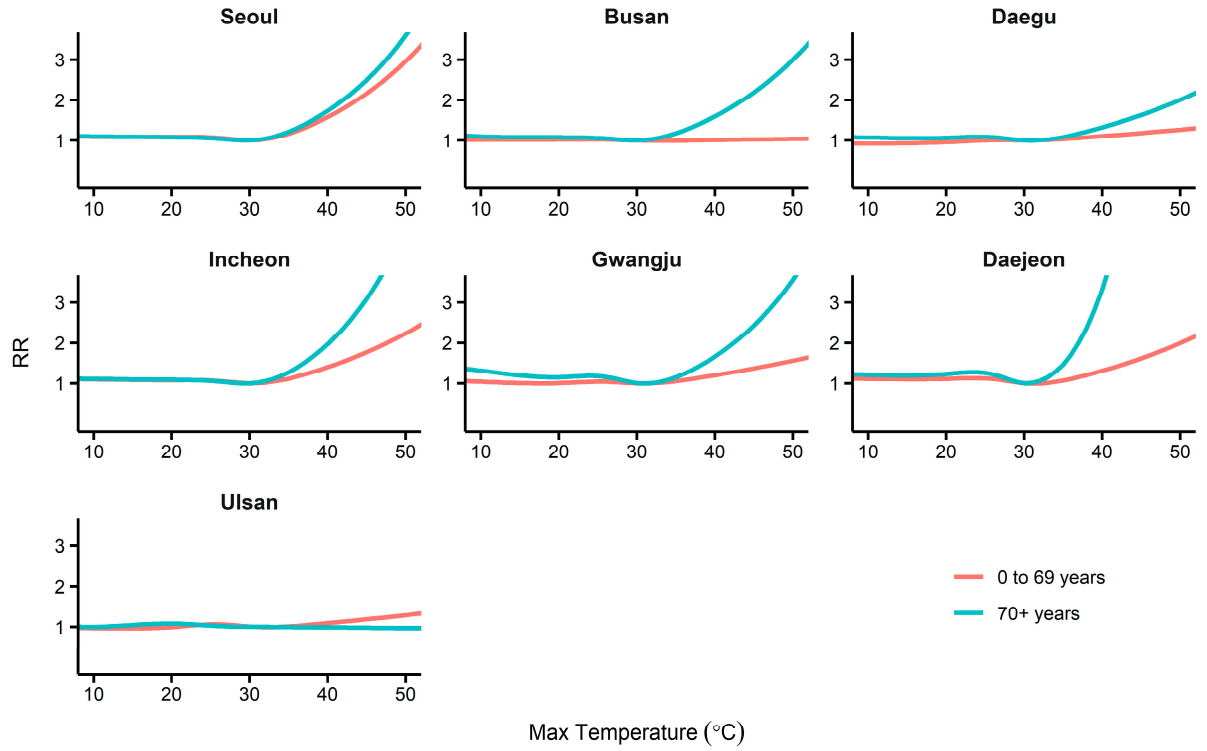

**Figure S6.** The city-specific relationship between daily maximum temperature and mortality for each age group.

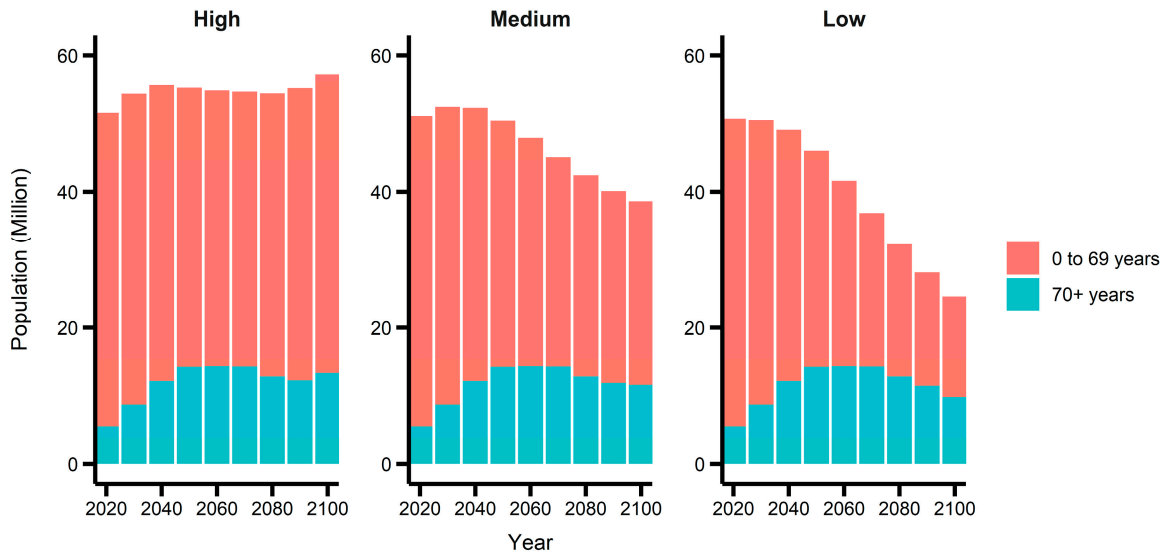

**Figure S7.** The population prospects of two age groups (0 to 69 years and 70+ years) in South Korea by United Nations (UN) until 2100 under three fertility variant scenarios (high, medium, and low).

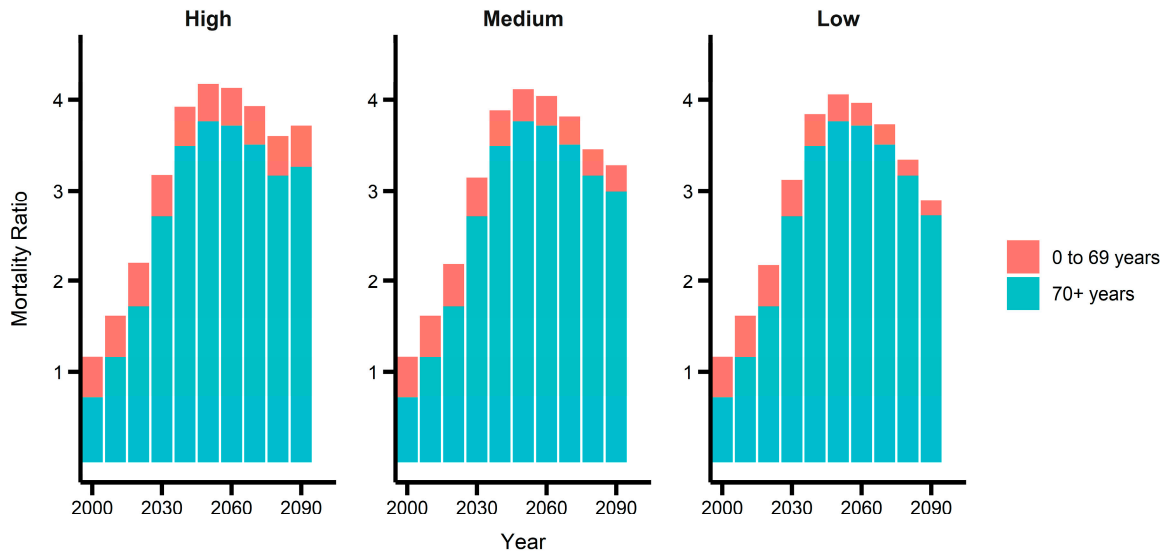

**Figure S8.** The breakdown of population-change-induced mortality ratio by age groups (0 to 69 years and 70+ years) in South Korea until 2100 under three fertility variant scenarios (high, medium, and low).

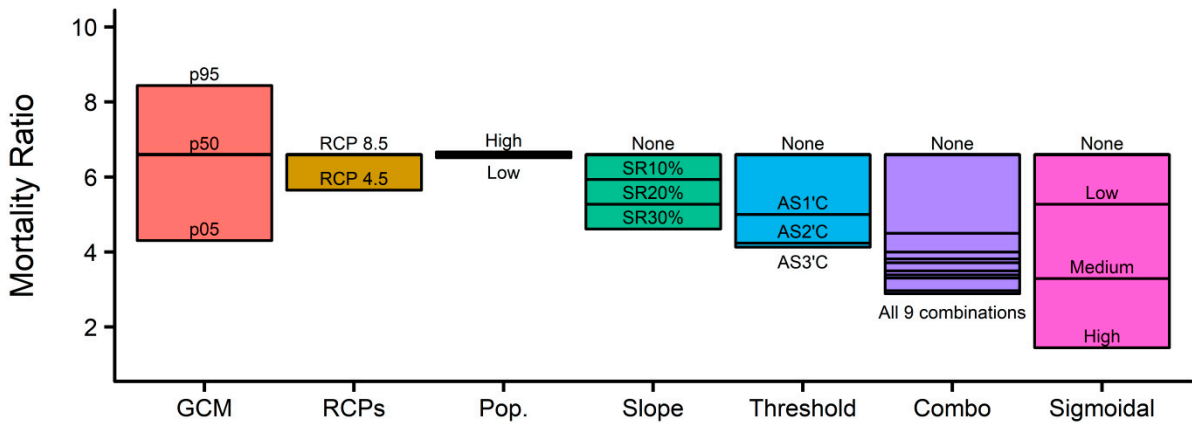

**Figure S9.** Variations in mortality ratio stemming from multiple climate, population and adaptation scenarios in the 2050s (2050–2059). Orange, dark yellow, green, turquoise, light blue, purple and magenta colors represent the range of variation due to the variations in GCMs, RCPs, population, and four adaptation scenarios (slope reduction, absolute threshold shift, the combination of the slope reduction and the threshold shift and the sigmoid function), respectively.
